# Supplementary material for: Exploring the Policy Feedback Effects of a No-Fault Compensation Scheme for COVID-19 Vaccine Injuries in Thailand: A Qualitative Study
Source: Research Square preprint supplement (doi:10.21203/rs.3.rs-6438801/v1), 2025-05-30
Supplement: Supplementary file 1 [file 119cc75648a9b32c0d64e3f1.pdf]

## Interview Guideline and Protocol

**Research project title:** Changes and policy feedback effects of no-fault compensation system in Thailand

**Duration:** Approximately 45–60 minutes

**Purpose:** This interview aims to understand the rationale, design, implementation and impacts of Thailand's no-fault compensation scheme (NFCS), particularly during the COVID-19 pandemic. The questions are grounded in Policy Feedback Theory and seek to identify both self-reinforcing and self-undermining feedback mechanisms across administrative, fiscal and sociopolitical dimensions.

**Participants:** Senior officials, administrators, legal experts and policymakers involved in the development, implementation, or oversight of Article 41 of the National Health Security Act and COVID-19 vaccine injury compensation.

### 1. Introduction (5 minutes)

- Introduction
- Clarification of the interview objectives
- Explanation of confidentiality and data use
- Request for consent to participate and audio record
- Opportunity for questions

### 2. Policy background and design (5 minutes)

| <i>Domain</i>         | <i>Key Questions</i>                                                                                                                                                                                                                                                                                            |
|-----------------------|-----------------------------------------------------------------------------------------------------------------------------------------------------------------------------------------------------------------------------------------------------------------------------------------------------------------|
| <i>Policy Origins</i> | What was the rationale behind launching the NFCS, particularly its application for COVID-19 vaccine injuries in Thailand?<br>What were the institutional processes and consultations involved in the scheme's rapid activation under Article 41?<br>How did the policy align with Thailand's broader UHC goals? |

### 3. Policy feedback during COVID-19 (20-30 minutes)

| <i>Domain</i>                            | <i>Key Questions</i>                                                                                                                                                                                                                                       |
|------------------------------------------|------------------------------------------------------------------------------------------------------------------------------------------------------------------------------------------------------------------------------------------------------------|
| <i>Administrative Effects</i>            | How did the NFCS affect the responsiveness of the health system during the pandemic? Were claim procedures clear, fast and user-friendly?<br>What were the key operational challenges (e.g., documentation, eligibility verification, decision timelines)? |
| <i>Fiscal Implications</i>               | How were funds for the scheme secured and allocated during the crisis? Did the scale of claims create strain on existing budgets?<br>How did NHSO manage the 1% UCS budget ceiling issue? Were special budgetary measures required?                        |
| <i>Public and Stakeholder Perception</i> | How did the public and different stakeholder groups perceive the NFCS? Was it seen as a reliable and fair mechanism?<br><br>Were there communications or media strategies used to improve awareness and reduce vaccine hesitancy?                          |

#### 4. Lessons learned and recommendations (10-15 minutes)

| <i><b>Domain</b></i>              | <i><b>Key Questions</b></i>                                                                                                                                                                        |
|-----------------------------------|----------------------------------------------------------------------------------------------------------------------------------------------------------------------------------------------------|
| <i>Policy Learning and Reform</i> | In hindsight, what were the most effective features of the scheme?<br>What changes would improve its effectiveness and sustainability?                                                             |
| <i>Institutional Credibility</i>  | Did the NFCS strengthen institutional legitimacy for NHSO or the Ministry of Public Health?<br>Were there any unintended consequences that have shaped future policymaking or public expectations? |
| <i>Broader Impacts</i>            | Could this experience influence future responses to other vaccines or public health emergencies?                                                                                                   |

#### 5. Conclusion (5 minutes)

- Invite any final reflections or messages for policymakers
- Thank participant and explain next steps for reporting and follow-up
