# Supplementary material for: Exploring the Policy Feedback Effects of a No-Fault Compensation Scheme for COVID-19 Vaccine Injuries in Thailand: A Qualitative Study
Source: Research Square preprint supplement (doi:10.21203/rs.3.rs-6438801/v1), 2025-05-30
Supplement: Supplementary file 2 [file abdb973cfe40403da5498aa1.pdf]

## Focus group discussion guide and protocol

**Research project title:** Changes and policy feedback effects of no-fault compensation system in Thailand

**Duration:** Approximately 90–120 minutes

**Participants:** Public health experts and healthcare administrators

### 1. Introduction (5-10 minutes)

- Welcome and participant introductions
- Clarification of the discussion objectives
- Overview of confidentiality and data use
- Consent to participate and record the session
- Opportunity for questions

### 2. Opening context (10 minutes)

| <i>Domain</i>                       | <i>Key Questions</i>                                                                                                                                     |
|-------------------------------------|----------------------------------------------------------------------------------------------------------------------------------------------------------|
| <i>Background and Policy Intent</i> | What was your understanding of the objectives of the NFCS introduced during the COVID-19 vaccine rollout?<br>How did the scheme originate and establish? |

### 3. Exploring policy feedback (60-80 minutes)

| <i>Domain</i>                              | <i>Key Questions</i>                                                                                                                                                                      |
|--------------------------------------------|-------------------------------------------------------------------------------------------------------------------------------------------------------------------------------------------|
| <i>Administrative Effects</i>              | What worked well in the implementation of the claims and compensation process? What bottlenecks were observed?<br>Were frontline healthcare providers engaged or informed in the process? |
| <i>Fiscal Effects</i>                      | Was the scale of compensation fiscally manageable during the pandemic? Were there concerns about sustainability?                                                                          |
| <i>Public Trust and Vaccine Confidence</i> | Did the NFCS impact vaccine uptake or acceptance in your view?<br>Were there demographic groups (e.g., youth, informal workers, older persons) who remained sceptical despite the scheme? |
| <i>Communication and Engagement</i>        | What were the most effective outreach strategies used by NHSO? What improvements are needed in public communication during future crises?                                                 |

### 4. Future directions and reflections (15-20 minutes)

| <i>Domain</i>                 | <i>Key Questions</i>                                                                                                                                                          |
|-------------------------------|-------------------------------------------------------------------------------------------------------------------------------------------------------------------------------|
| <i>Policy Learning</i>        | What lessons can be drawn from Thailand's NFCS that other LMICs could adapt?<br>Should similar compensation schemes be institutionalised for other public health emergencies? |
| <i>Institutional Capacity</i> | How can administrative and fiscal capacities be improved for better preparedness?                                                                                             |

### 5. Conclusion (5-10 minutes)

- Invite any final suggestions or comments
- Thank participants for their time and insights
- Outline next steps for documentation, reporting and manuscript
